# Supplementary material for: Multivariate brain-based dimensions of child psychiatric problems: degrees of generalizability
Source: bioRxiv or medRxiv preprint supplement (doi:10.1101/2023.03.12.23287158), 2023-03-20
Supplement: Supplementary file [file media-1.pdf]

## **Supplementary Information**

Multivariate brain-based dimensions of child psychiatric problems:  
degrees of generalizability

1. Supplementary tables 1-5
2. Supplementary figures 1-2

**Supplementary Table 1***MRI acquisition parameters in ABCD*

|         | Matrix    | Slices | FOV       | TR<br>(ms) | TE<br>(ms) | TI<br>(ms) | Flip Angle<br>(deg) | MultiBand<br>Acceleration | Acquisition<br>Time |
|---------|-----------|--------|-----------|------------|------------|------------|---------------------|---------------------------|---------------------|
| Siemens |           |        |           |            |            |            |                     |                           |                     |
| T1      | 256 × 256 | 176    | 256 × 256 | 2500       | 2.88       | 1060       | 8                   | Off                       | 7:12                |
| fMRI    | 90 × 90   | 60     | 216 × 216 | 800        | 30         | N/A        | 52                  | 6                         |                     |
| Philips |           |        |           |            |            |            |                     |                           |                     |
| T1      | 256 × 256 | 225    | 256 × 240 | 6.31       | 2.9        | 1060       | 8                   | Off                       | 5:38                |
| fMRI    | 90 × 90   | 60     | 216 × 216 | 800        | 30         | N/A        | 52                  | 6                         |                     |
| GE      |           |        |           |            |            |            |                     |                           |                     |
| T1      | 256 × 256 | 208    | 256 × 256 | 2500       | 2          | 1060       | 8                   | Off                       | 6:09                |
| fMRI    | 90 × 90   | 60     | 216 × 216 | 800        | 30         | N/A        | 52                  | 6                         |                     |

*Note.* Parameters retrieved from the ABCC collection (<https://collection3165.readthedocs.io/en/stable/inputs/>).

**Supplementary Table 2***MRI acquisition parameters in Generation R*

|               | <b>Matrix</b> | <b>Slices thickness (mm)/<br/>Number of slices</b> | <b>FOV</b> | <b>TR<br/>(ms)</b> | <b>TE<br/>(ms)</b> | <b>TI<br/>(ms)</b> | <b>Flip Angle<br/>(deg)</b> |
|---------------|---------------|----------------------------------------------------|------------|--------------------|--------------------|--------------------|-----------------------------|
| <b>GE 750</b> |               |                                                    |            |                    |                    |                    |                             |
| <b>T1</b>     | 220 × 220     | 1.0/230                                            | 220 × 220  | 8.77               | 3.4                | 600                | 10                          |
| <b>fMRI</b>   | 64 × 64       | 4.0/36                                             | 216 × 216  | 1760               | 30                 | N/A                | 85                          |

*Note.* T1-weighted images were obtained using a coronal inversion recovery fast spoiled gradient recalled sequence using ARC acceleration (GE option BRAVO). Rs-fMRI data were obtained using an interleaved axial echo planar imaging sequence. Total duration of the resting-state scan was 5 minutes 52 seconds for each child.

### Supplementary Table 3

Canonical correlations in training and test sets of ABCD across 10 splits  
(Train-test split with pooled multisite data)

|          | Canonical Correlations | Training | Test    | Sparsity |     |
|----------|------------------------|----------|---------|----------|-----|
| Split 1  | $r_1$                  | 0.20     | 0.10*** | Rs-fMRI  | 0.4 |
|          | $r_2$                  | 0.18     | 0.06*   | CBCL     | 0.5 |
|          | $r_3$                  | 0.19     | 0.10*** |          |     |
| Split 2  | $r_1$                  | 0.18     | 0.13**  | Rs-fMRI  | 0.4 |
|          | $r_2$                  | 0.17     | 0.09*   | CBCL     | 0.5 |
|          | $r_3$                  | 0.15     | 0.11**  |          |     |
| Split 3  | $r_1$                  | 0.18     | 0.12*** | Rs-fMRI  | 0.4 |
|          | $r_2$                  | 0.17     | 0.06*   | CBCL     | 0.5 |
|          | $r_3$                  | 0.17     | 0.07*   |          |     |
| Split 4  | $r_1$                  | 0.16     | 0.12*** | Rs-fMRI  | 0.3 |
|          | $r_2$                  | 0.16     | 0.09**  | CBCL     | 0.5 |
|          | $r_3$                  | 0.14     | 0.10**  |          |     |
| Split 5  | $r_1$                  | 0.19     | 0.16*** | Rs-fMRI  | 0.5 |
|          | $r_2$                  | 0.19     | 0.06*   | CBCL     | 0.5 |
|          | $r_3$                  | 0.16     | 0.11*** |          |     |
| Split 6  | $r_1$                  | 0.15     | 0.15*** | Rs-fMRI  | 0.3 |
|          | $r_2$                  | 0.14     | 0.07*   | CBCL     | 0.6 |
|          | $r_3$                  | 0.09     | 0.07**  |          |     |
| Split 7  | $r_1$                  | 0.17     | 0.12*** | Rs-fMRI  | 0.4 |
|          | $r_2$                  | 0.14     | 0.06*   | CBCL     | 0.5 |
|          | $r_3$                  | 0.15     | 0.10*** |          |     |
| Split 8  | $r_1$                  | 0.17     | 0.13*** | Rs-fMRI  | 0.3 |
|          | $r_2$                  | 0.14     | 0.06*   | CBCL     | 0.5 |
|          | $r_3$                  | 0.15     | 0.08**  |          |     |
| Split 9  | $r_1$                  | 0.18     | 0.10*** | Rs-fMRI  | 0.4 |
|          | $r_2$                  | 0.16     | 0.06*   | CBCL     | 0.5 |
|          | $r_3$                  | 0.16     | 0.07**  |          |     |
| Split 10 | $r_1$                  | 0.18     | 0.13*** | Rs-fMRI  | 0.3 |
|          | $r_2$                  | 0.15     | 0.07**  | CBCL     | 0.5 |
|          | $r_3$                  | 0.15     | 0.09**  |          |     |

Note. We pooled the data from 21 sites together and randomly split it into a training set (ABCD<sub>Training</sub>, 80% of the data) and a test set (ABCD<sub>Test</sub>, 20% of the data). The canonical correlations in the ABCD<sub>Test</sub> sets were calculated by applying the weight vectors obtained from the ABCD<sub>Training</sub> set SCCA model to the test sets. This process was repeated 10 times in the 10 training-test splits.

\*  $p < 0.05$ , \*\*  $p < 0.01$ , \*\*\*  $p < 0.001$

### Supplementary Table 4

*Failed gold-standard generalizability test in Generation R*

| Canonical correlations | ABCD         |          | Generation R |
|------------------------|--------------|----------|--------------|
|                        | training set | test set |              |
| $r_1$                  | 0.20         | 0.13***  | 0.04         |
| $r_2$                  | 0.19         | 0.08**   | 0.03         |
| $r_3$                  | 0.17         | 0.06*    | 0.03         |

*Note.* Canonical correlations in ABCD were averaged across the 10 train-test splits.

$r_1$ : \*\*\*  $p < 0.001$  across all 10 train-test splits.  $r_2$ : \*\*  $p < 0.01$  in 8 train-test splits.

$r_3$ : \*  $p < 0.05$  in 5 train-test splits.  $r_1$  Generation R:  $p < 0.01$  in 3 train-test splits.

### Supplementary Table 5

*Correlations between the first three brain canonical variates and cognitive ability (n=5,269)*

|            | Fluid intelligence |          | crystallized intelligence |          | matrix reasoning   |          | total cognition     |          |
|------------|--------------------|----------|---------------------------|----------|--------------------|----------|---------------------|----------|
|            | B (95% CI)         | <i>P</i> | B (95% CI)                | <i>p</i> | B (95% CI)         | <i>p</i> | B (95% CI)          | <i>p</i> |
| <b>CV1</b> | 0.05 [0.02, 0.08]  | < .001   | 0.06 [0.02, 0.07]         | < .001   | 0.03 [0.01, 0.06]  | 0.01     | 0.06 [0.03, 0.08]   | <.001    |
| <b>CV2</b> | 0.03 [0.01, 0.06]  | 0.01     | 0.04 [0.02, 0.07]         | < .001   | 0.04 [0.01, 0.06]  | 0.003    | 0.05 [0.02, 0.07]   | <.001    |
| <b>CV3</b> | 0.02 [-0.01, 0.04] | 0.22     | 0.02 [-0.01, 0.04]        | 0.22     | 0.03 [0.003, 0.05] | 0.03     | 0.02 [-0.004, 0.04] | 0.11     |

*Note.* Separate linear regression analysis of cognitive ability and the first three brain canonical variates. Betas are standardized. All the models were adjusted for child age, child sex, race/ethnicity, parental education, and scanning sites. After excluding the participants with missing values in any of the four cognitive abilities, the final sample size of this analysis is 5,269. **CV1**: brain canonical variate 1, **CV2**: brain canonical variate 2, **CV3**: brain canonical variate 3.

## Supplementary Figure 1

*CBCL canonical loadings in ABCD and Generation R in qualitative replication*

### a. ABCD

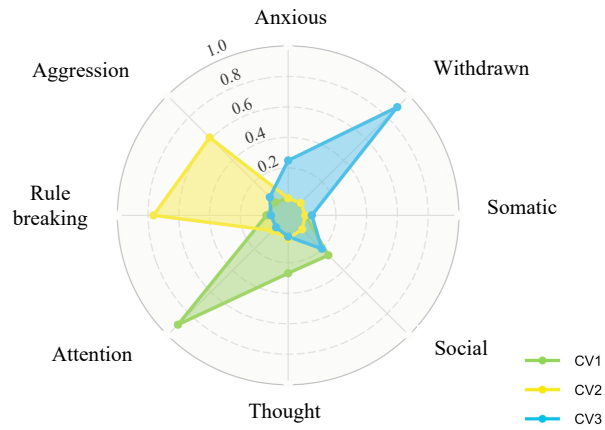

### b. Generation R

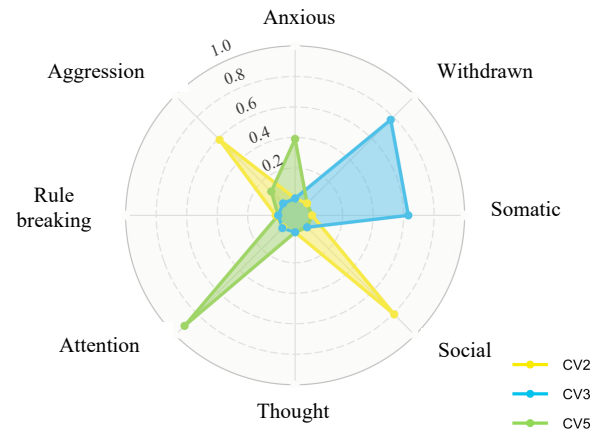

*Note.* The comparison of canonical loadings for CBCL syndrome scores in ABCD and Generation R. **a.** The canonical loadings of CBCL syndrome scores in ABCD. **b.** The canonical loadings of CBCL syndrome scores in Generation R. **CV1:** canonical variate 1, **CV2:** canonical variate 2, **CV3:** canonical variate 3.

## Supplementary Figure 2

*Canonical loadings in Generation R in qualitative replication*

### a. CBCL loadings

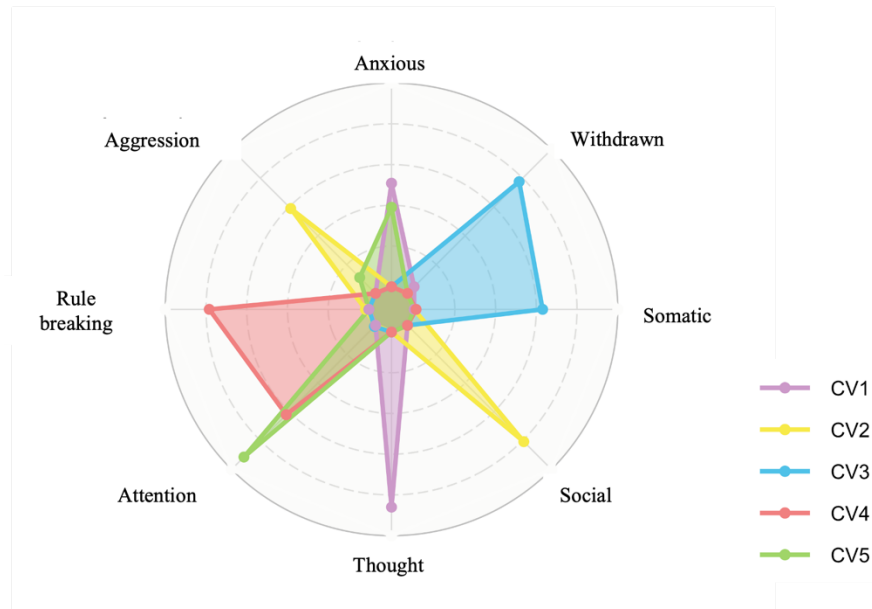

### b. Resting-state connectivity canonical variates

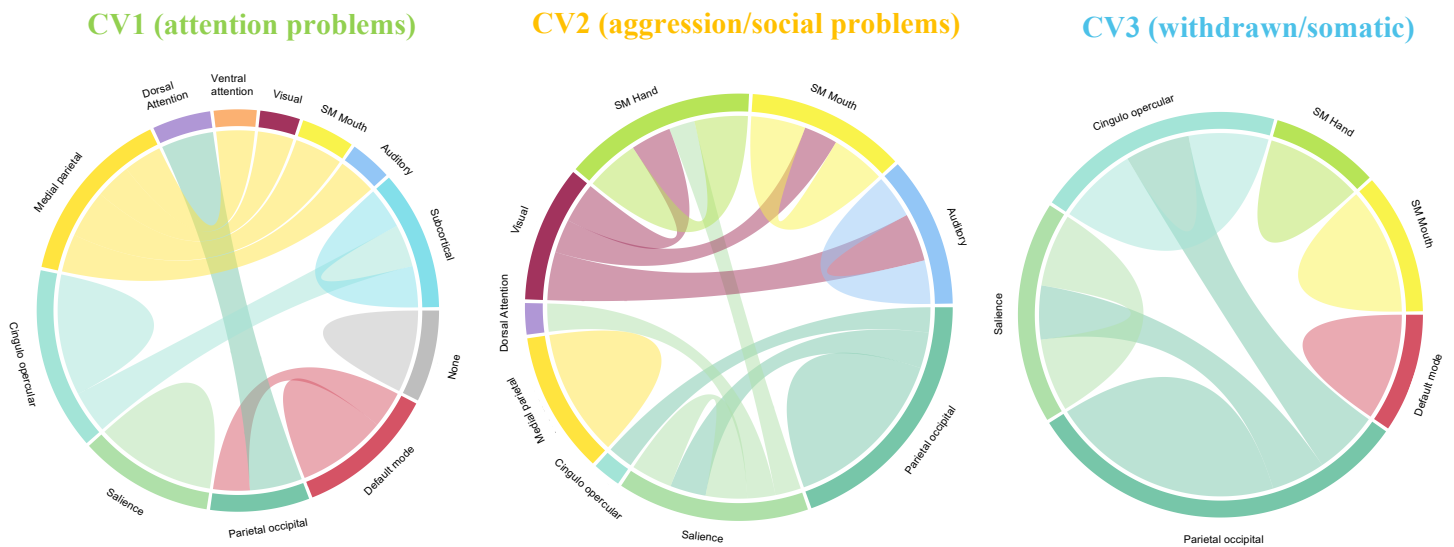

*Note. a. the five canonical variates survived permutation tests in Generation R. b. brain connectivity modules involved in the three identified canonical variates in Generation R that are similar with ABCD.*
